# Supplementary material for: Nanoscale Structure Determination of Murray Valley Encephalitis and Powassan Virus Non-Coding RNAs
Source: PubMed Central journal article supplement (PMC7077200; doi:10.3390/v12020190), 2020-02-08
Supplement: viruses-12-00190-s001.pdf [file viruses-12-00190-s001.pdf]

Article

# Nanoscale Structure Determination of Murray Valley Encephalitis and Powassan Virus Non-coding RNAs

Tyler Mrozowich <sup>1</sup>, Amy Henrickson <sup>1</sup>, Borries Demeler<sup>1,4,5</sup> and Trushar R Patel <sup>1,2,3,5\*</sup>

Supplementary Information

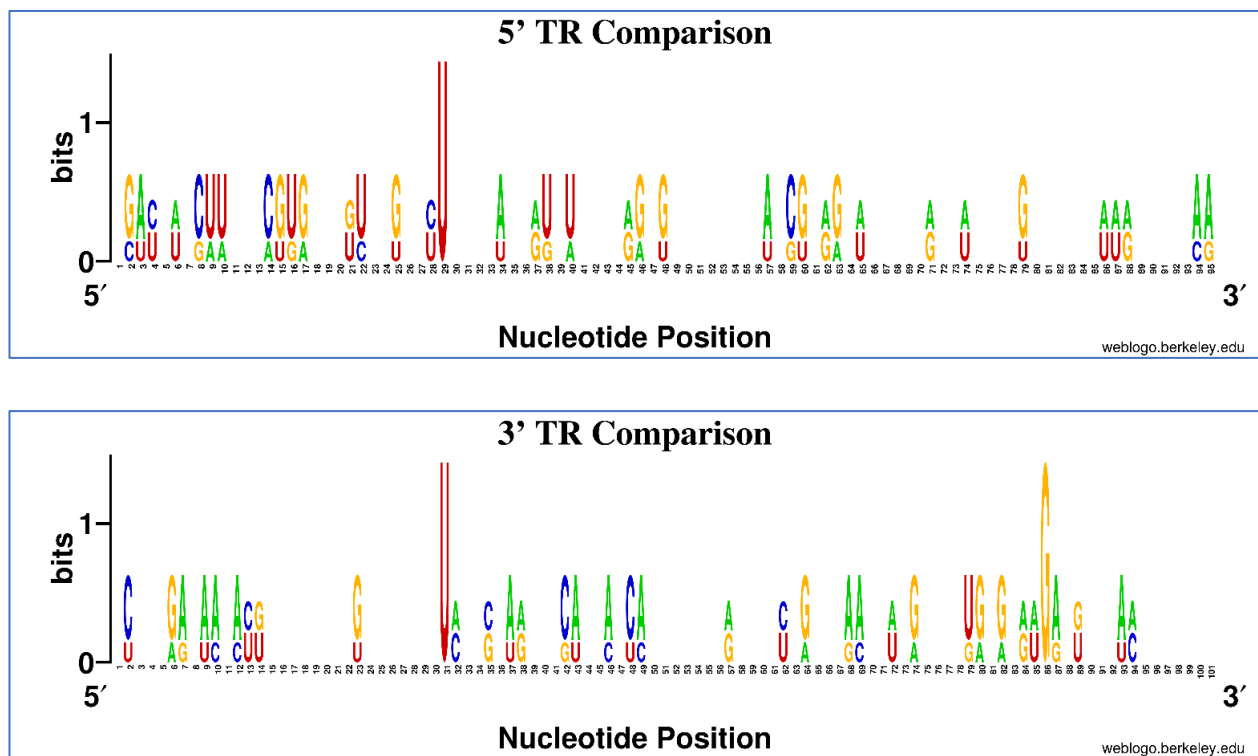

Supplementary Figure 1: Sequence alignment of 5' (top panel, first 95 nucleotides) and 3' (bottom panel, last 101 nucleotides) TRs of Powassan, Murray valley encephalitis, dengue, and West Nile viruses. The sequences used for alignment are presented below. The alignment was performed using WEBLOGO (<https://weblogo.berkeley.edu/logo.cgi>).

>PowV 5'TR

```
AGAUUUUCUUGCACGUGUGUGCGGGUGCUUUAGUCAGUGUCCGCAGCGUUC
UGUUGAACGUGAGUGUGUUGAGAAAAAGACAGCUUAGGAGAACAAGAGCU
```

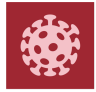

>MVEV 5'TR

CCUGGGAAAAGACUAGGAGAUCUUCUGCUCUAUCCAACAUCAGUCACAAG  
GCACCGAGCGCCGAACACUGUGACUGAUGGGGGGAGAAGACCACAGGAUCU

>DENV 5'TR

GCUUAACGUAGUGCUGACAGUUUUUUUUUAGAGAGCAGAUCUCUGAUGAAC  
AACCAACGGAAGAAGACGGGAAAACCGUCUAUCAAUUAGCUGAAACGCGU

>WENV 5'TR

UGACAAACUUAGUAGUGUUUGUGAGGAUUACAACAAUUAACACAGUGCG  
AGCUGUUUCUUAGCACGAAGAUCUCGAUGUCUAAGAAACCAGGAGGGCCCG

3'TR comparison (First 101 nt)

>PowV 3'TR

CCCCAGGAAACUGGGGGGGCGGUUCUUGUUCUCCUGAGCCACCACCAUCC  
AGGCACAGAUAGCCUGACAAGGAGAUGGUGUGUGACUCGGAAAAACACC

>MVEV 3'TR

CCUGGGAAAAGACUAGGAGAUCUUCUGCUCUAUCCAACAUCAGUCACAAG  
GCACCGAGCGCCGAACACUGUGACUGAUGGGGGGAGAAGACCACAGGAUCU

>DENV 3'TR

UCUUGGACUAUAUGCCUUCAAUGAAGAGGUUCAGGAAGGAAGAGGAGUCGG  
AGGGGGCCAUUUGGUAAACGUAGGAAGUGAAAAAGAGGCUAACUGUCAGG

>WENV 3'TR

AUGAAGACACAACUUUAGUUGAGGACACAGUACUGUAAAUAUUUAUCAA  
UUGUAAAUAAGACAAUAUAAGCAUGUAUAUAGGUUUGUUUAUAGUGGCA  
U

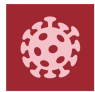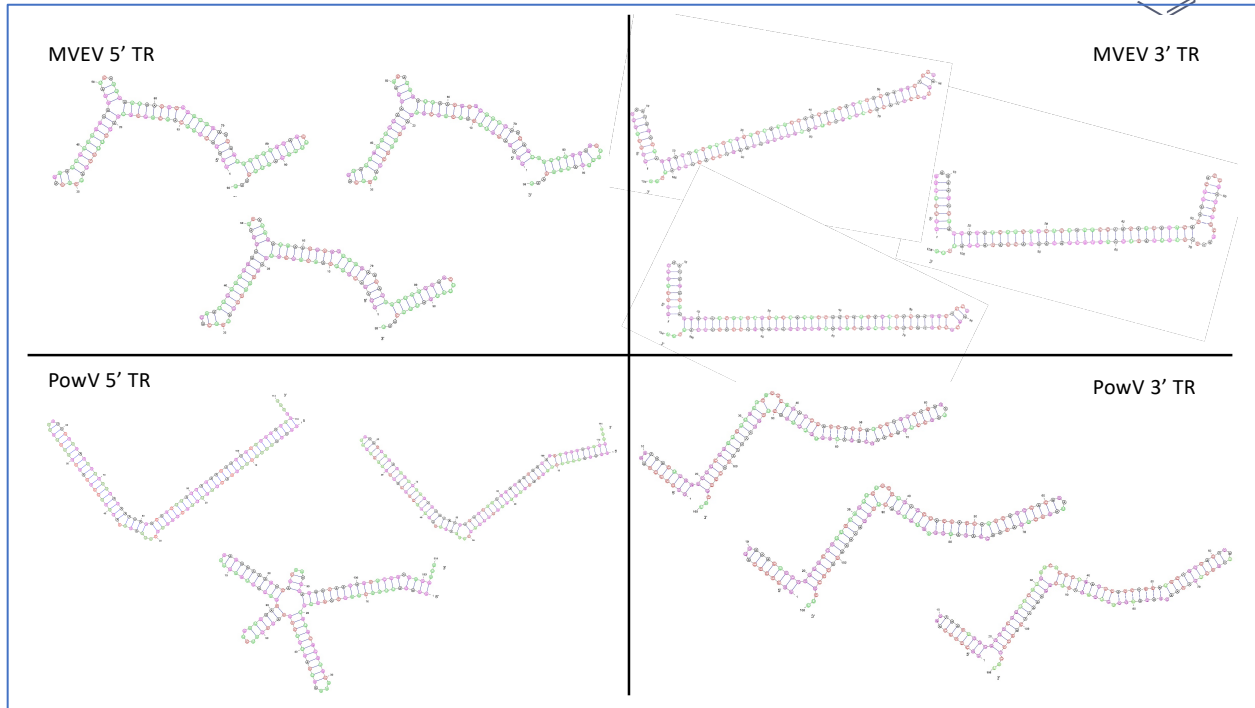

Supplementary Figure 2: The lowest energy structures of MVEV and PowV 5' and 3' terminal regions are presented in Figure 1. This figure illustrates the next three lowest energy structures for each RNA structure.
